# Supplementary material for: Study of degradation mechanisms in aqueous-processed Ni-rich cathodes for enhanced sustainability of batteries
Source: Royal Society of Chemistry journal article supplement (doi:10.1039/d4ta03592e), 2024-01-01
Supplement: d4ta03592e1.pdf [file d4ta03592e1.pdf]

Supporting Information

Study of degradation mechanisms in aqueous-processed Ni-rich cathodes for  
Enhanced Sustainability of Batteries

Heyin Chen<sup>a</sup>, Agnes-Matilda Mattsson<sup>a</sup>, Laura King<sup>a</sup>, Haidong Liu<sup>a</sup>, Ida Nielsen<sup>a</sup>,  
Tove Ericsson<sup>a</sup>, Alexei Preobrajenski<sup>b</sup>, William R. Brant<sup>a\*</sup>, Maria Hahlin<sup>a,c\*</sup>

<sup>a</sup> Department of Chemistry – Ångström Laboratory, Uppsala University, Box 538, 751 20 Uppsala, Sweden

<sup>b</sup> MAX IV Laboratory, Lund University, Box 118, 221 00 Lund, Sweden

<sup>c</sup> Department of Physics and Astronomy, Uppsala University, Box 516, 75120 Uppsala, Sweden

Supplementary Figures

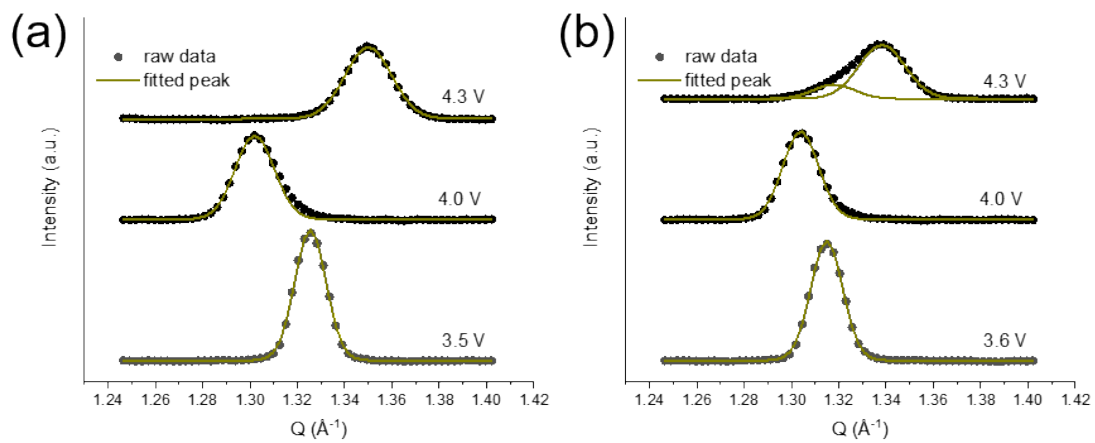

Figure S1. Single peak fitting for the 003 reflection of fresh NMP<sub>NMC</sub> electrodes (a), single and double peaks fitting for the 003 reflection of aged H<sub>2</sub>O<sub>NMC</sub> electrodes (b) under various states of charge.

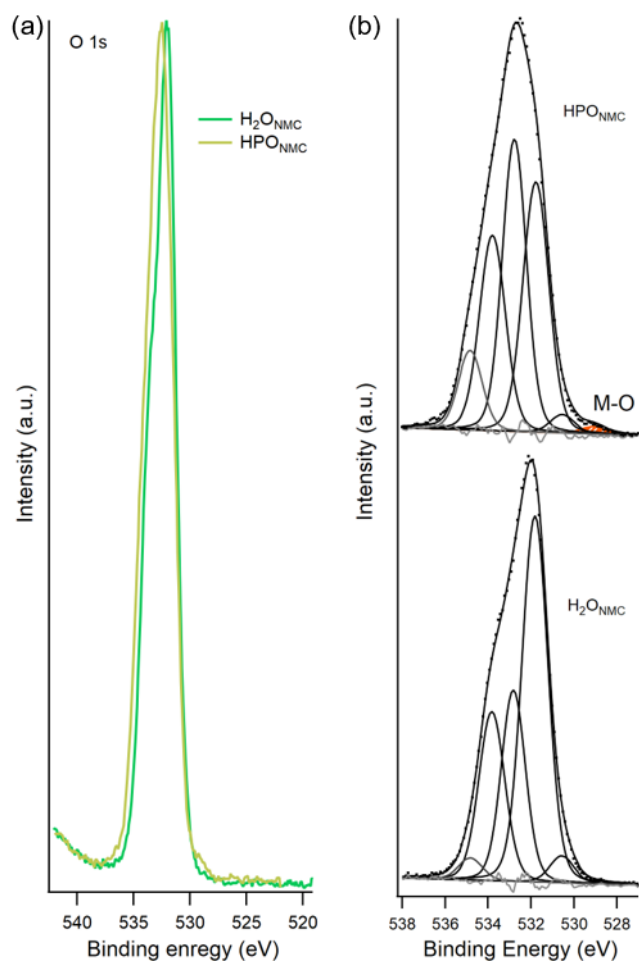

Figure S 2. The overlaid (a) and the curve fitted (b) O 1s spectra collected from H<sub>2</sub>O<sub>NMC</sub> and HPO<sub>NMC</sub> electrodes after 105 cycles with photon energy 1486.7 eV, normalized to the highest peak intensity.

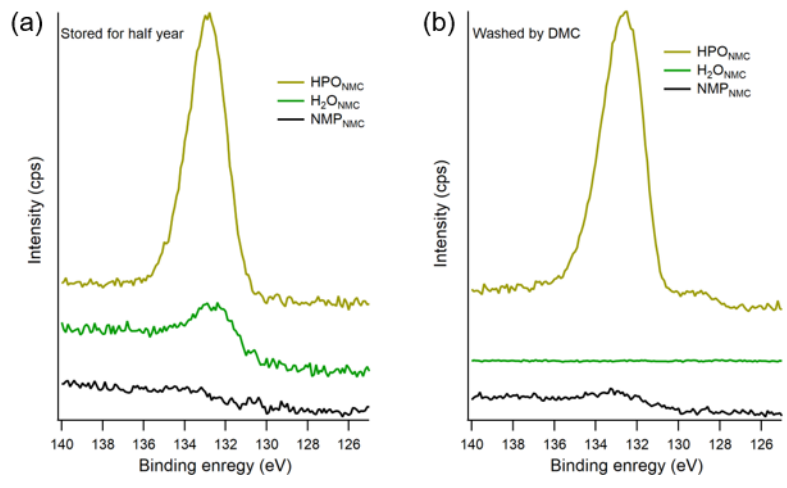

Figure S3. The P2p spectra were collected from pristine NMP<sub>NMC</sub>, H<sub>2</sub>O<sub>NMC</sub>, and HPO<sub>NMC</sub> electrodes after half a year of storage inside the Ar-filled glovebox (a) and after being washed by DMC (b) using the Al K $\alpha$  source

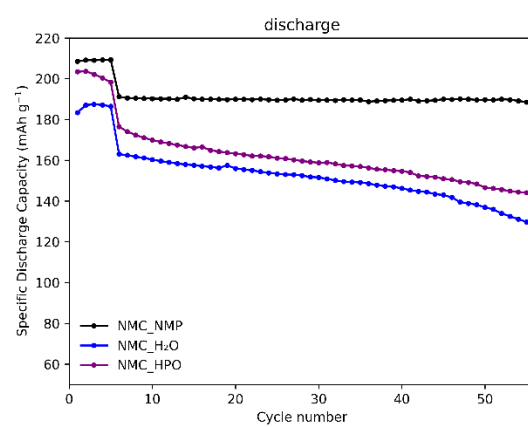

Figure S4. The specific discharge capacity of three electrodes with galvanostatic cycling at 0.1C for 5 cycles and 0.5C for 55 cycles within the voltage range of 3.0-4.3V vs. Li<sup>+</sup>/Li before Operando XRD measurements.

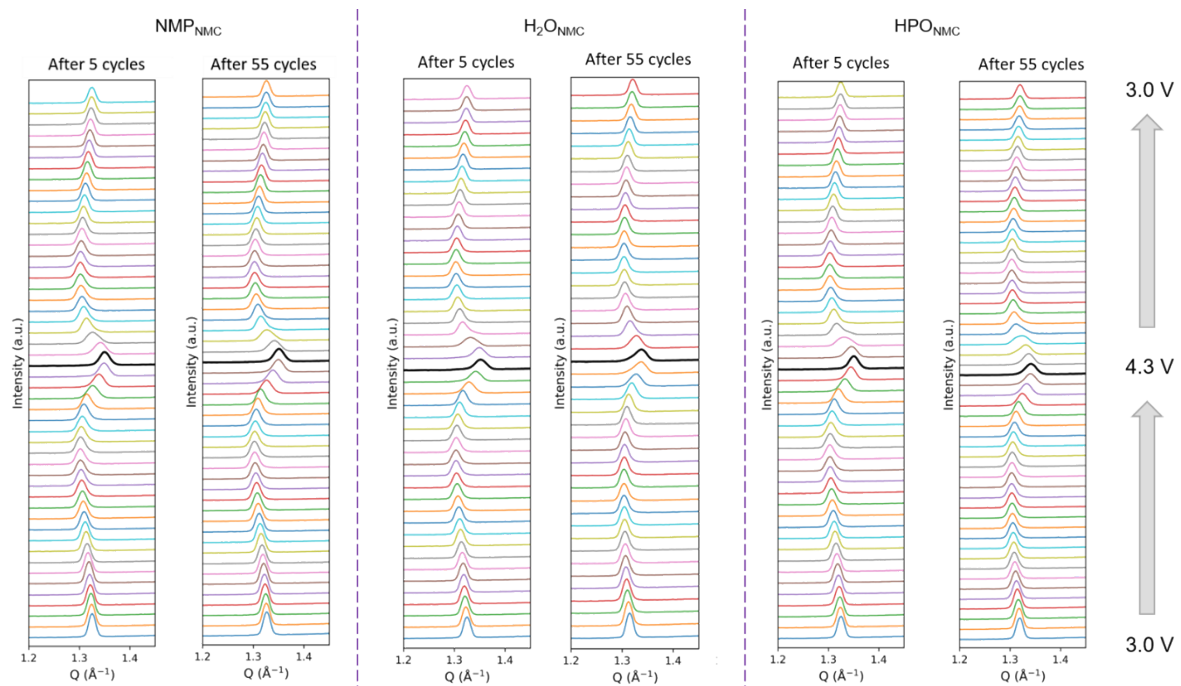

Figure S5. Waterfall plot of 003 reflection of  $\text{NMP}_{\text{NMC}}$  (a),  $\text{H}_2\text{O}_{\text{NMC}}$  (b), and  $\text{HPO}_{\text{NMC}}$  (c) electrodes after 5 formation and 55 cycles during cycling between 3.0 V and 4.3 V.

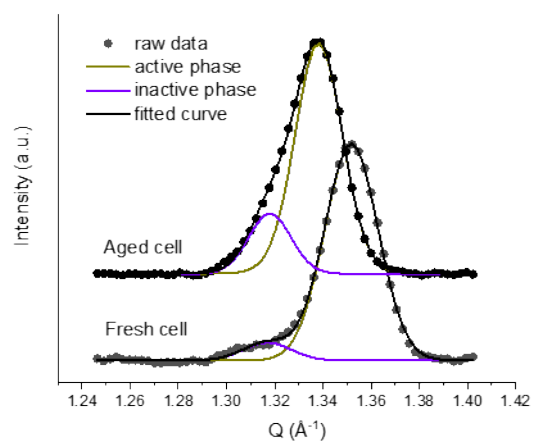

*Figure S6. 003 reflection curves of fresh and aged  $H_2O_{NMC}$  at 4.3V fitted with two distinct peaks representing to electrochemically active and inactive phase, respectively.*

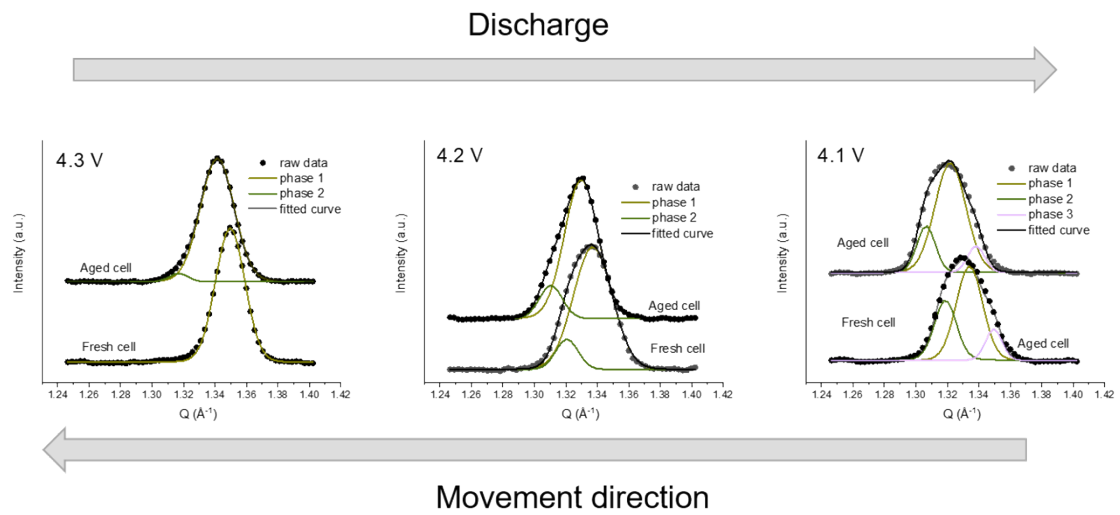

Figure S7. 003 reflection curves of the fresh and aged  $\text{HPO}_{\text{NMC}}$  electrode during discharge at  $\sim 4.3$  V,  $\sim 4.2$  V, and  $\sim 4.1$  V, fitted with two or three peaks corresponding to different distinct phases.



## Supplementary Table

*Table S1. Ni concentrations in the electrolytes collected from three aged batteries.*

| Cathodes                                 | NMP <sub>NMC</sub> | H <sub>2</sub> O <sub>NMC</sub> | HPO <sub>NMC</sub> |
|------------------------------------------|--------------------|---------------------------------|--------------------|
| Concentration of Ni (ppm) in electrolyte | 6.0                | 2.4                             | 4.6                |
